# Supplementary material for: Striatal Dopamine Transporter Availability Is Not Associated with Food Craving in Lean and Obese Humans; a Molecular Imaging Study
Source: MDPI journal article supplement (doi:10.3390/brainsci11111428), 2021-10-28
Supplement: s1 [file s1]

### SUPPLEMENTAL FIGURE S1

DAT BP<sub>ND</sub> in the Caudate and Putamen.

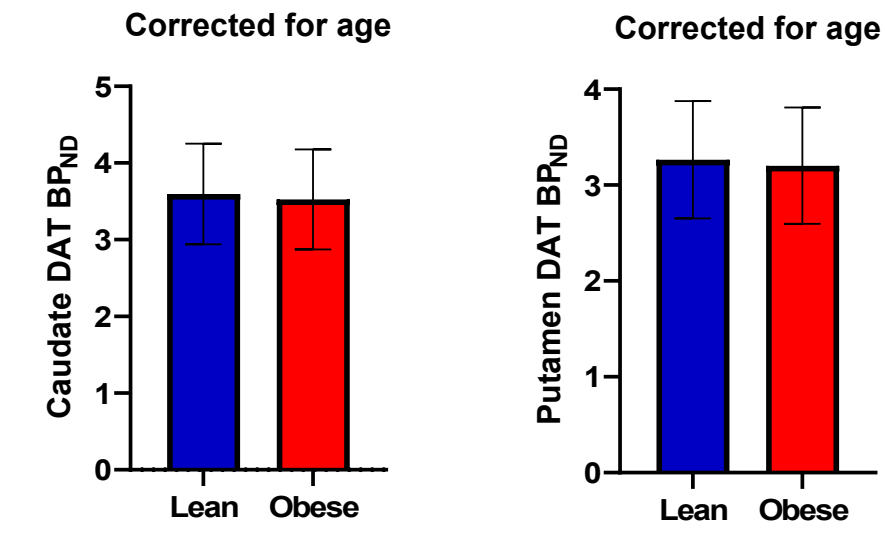

**Supplemental figure S1.** DAT BP<sub>ND</sub> (mean  $\pm$  SD) in the **(A)** Caudate and **(B)** Putamen did not differ significantly between lean subjects and subjects with obesity after controlling for age (one-way ANCOVA).

## SUPPLEMENTAL FIGURES S2AB

Sub regional partial regression analysis adjusted for age between DAT BP<sub>ND</sub> and G-FCQ-T scores.

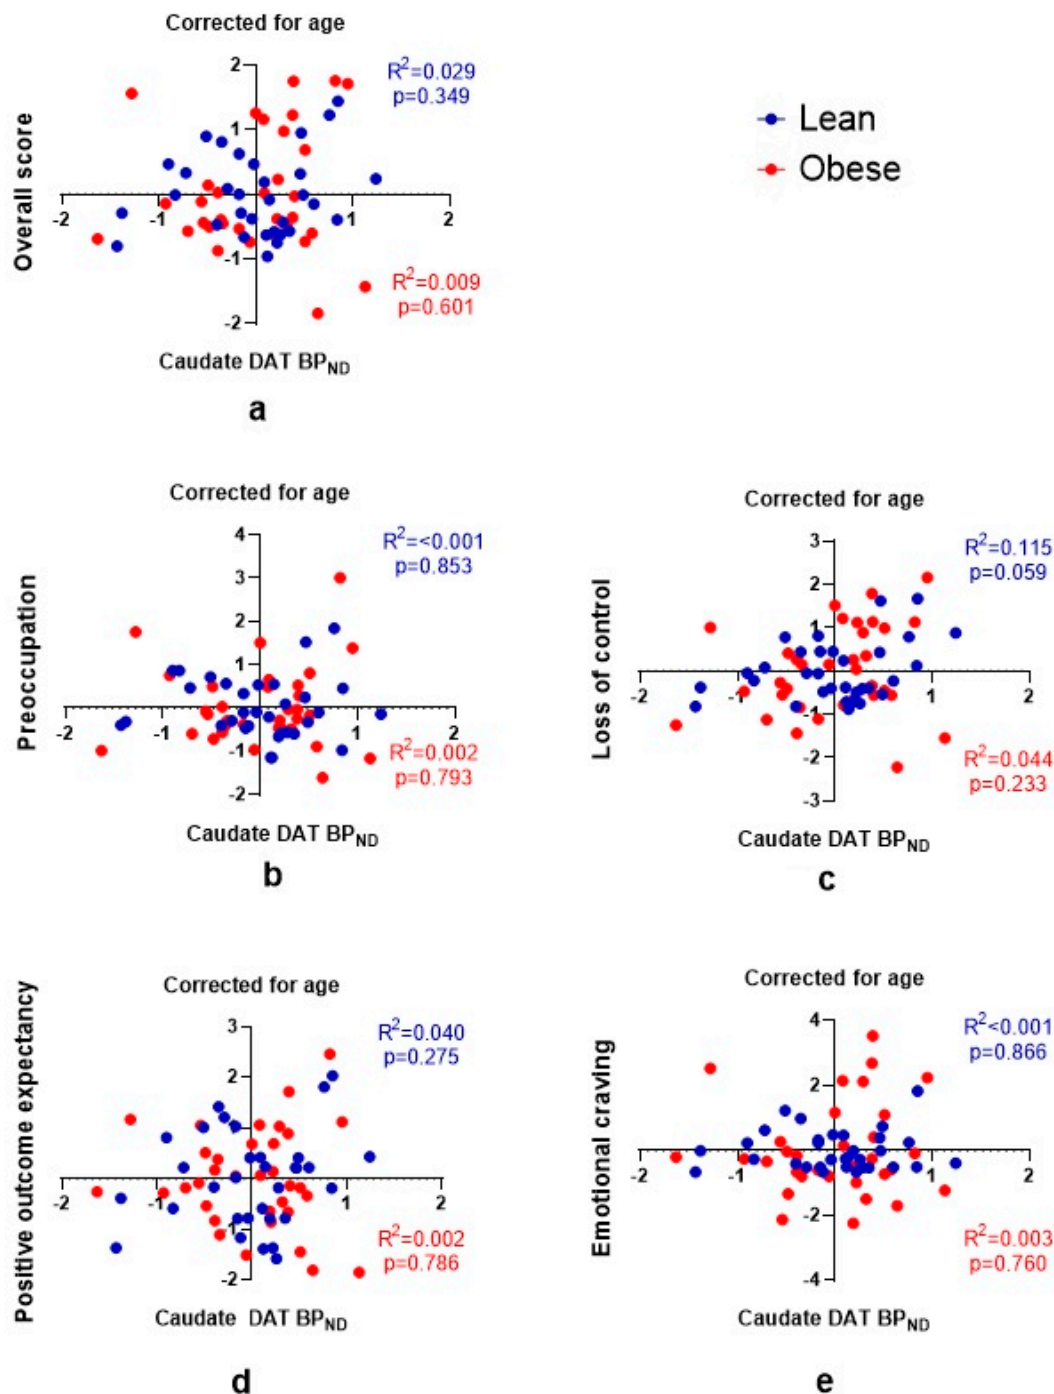

**Supplemental figure S2 A.** Partial regression plots showing no linear relationship between caudate DAT availability and G-FCQ-T scores for (a) the overall score, and the subscale scores (b) “preoccupation”, (c) “loss of control”, (d) “positive outcome expectancy”, (e) “emotional craving”, after adjusting for age in lean subjects and subjects with obesity. Blue dots: lean subjects; red dots: subjects with obesity.

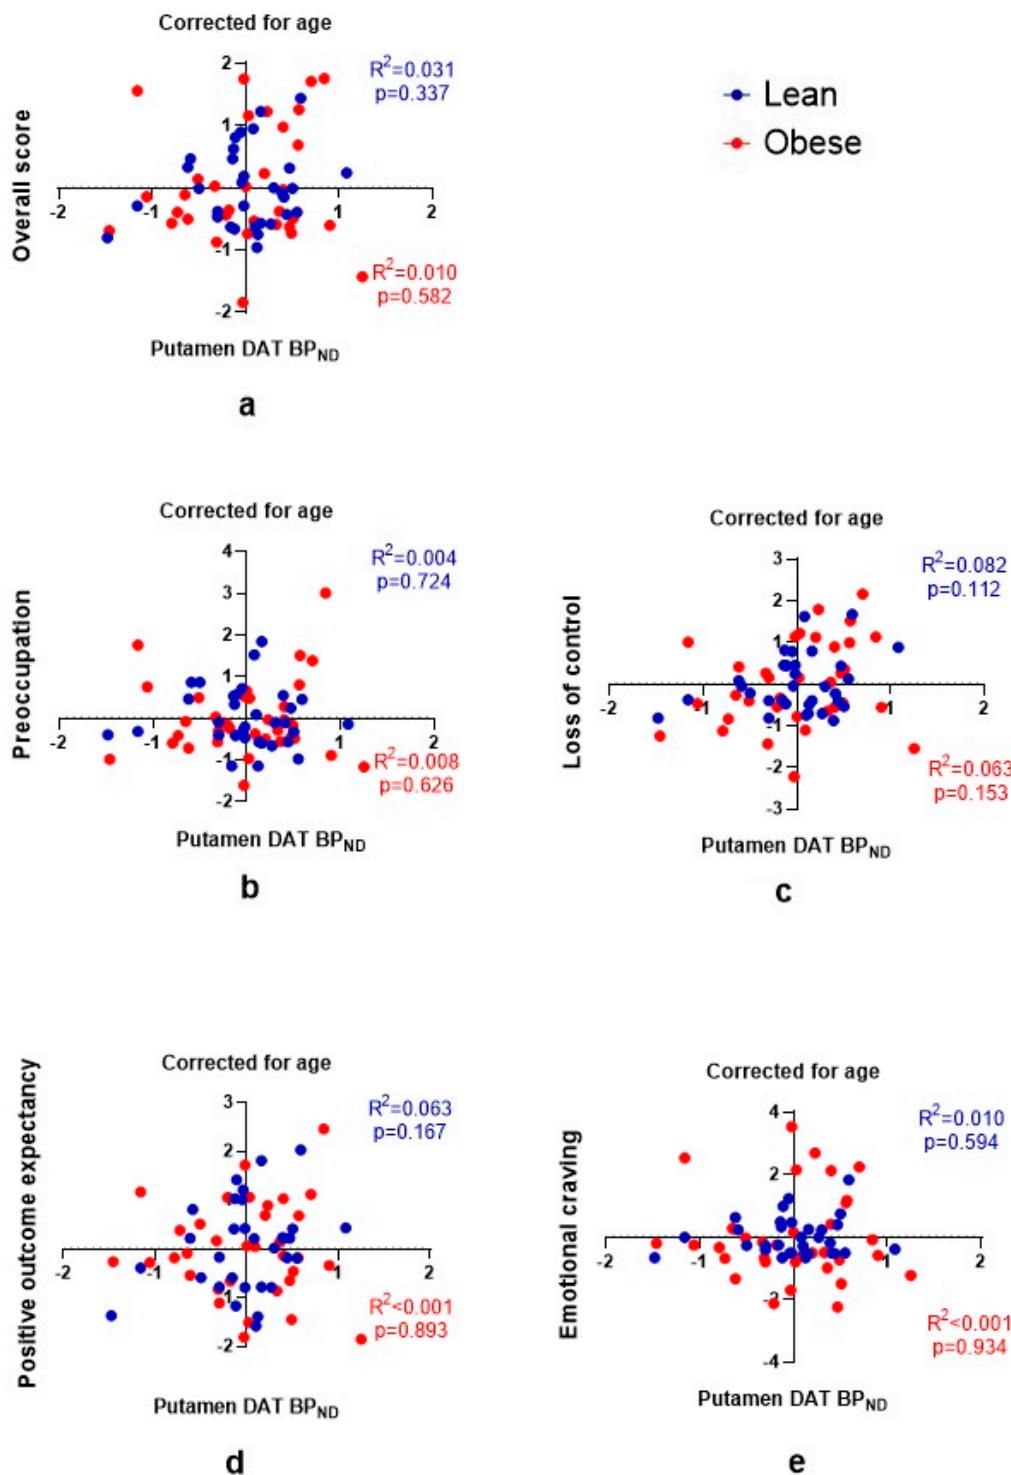

**Supplemental figure S2 B.** Partial regression plots showing no linear relationship between putamen DAT availability and G-FMQ-T scores for **(a)** the overall score, and the subscale scores **(b)** “preoccupation”, **(c)** “loss of control”, **(d)** “positive outcome expectancy”, **(e)** “emotional craving”, after adjusting for age in lean subjects and subjects with obesity. Blue dots: lean subjects; red dots: subjects with obesity.
